# Supplementary material for: Combining machine learning and quantum chemical calculations for high-throughput virtual screening of thermally activated delayed fluorescence molecular materials: the impact of selection strategy and structural mutations
Source: Royal Society of Chemistry journal article supplement (doi:10.1039/d2ra05643g), 2022-01-01
Supplement: d2ra05643g1.pdf [file d2ra05643g1.pdf]

**Electronic Supporting Information for**  
**“Combining Machine Learning and Quantum**  
**Chemical Calculations for High-Throughput**  
**Virtual Screening of Thermally Activated Delayed**  
**Fluorescence Molecular Materials: the Impact of**  
**Selection Strategy and Structural Mutations”**

Chunyun Tu,<sup>†</sup> Weijiang Huang,<sup>†</sup> Sheng Liang,<sup>‡</sup> Kui Wang,<sup>†</sup> Qin Tian,<sup>†</sup> and Wei  
Yan<sup>\*,†</sup>

<sup>†</sup>*School of Chemistry and Materials Engineering, Guiyang University, Guiyang, 550005, P.  
R. of China.*

<sup>‡</sup>*School of Mathematics and Information Science, Guiyang University, Guiyang, 550005,  
P. R. of China.*

E-mail: lrasyw@163.com

Phone: +86 1809 6050 905

## Generation of initial compound library G0

The initial compound library G0 is constructed by combining donors with acceptors at preset connection sites (symbol \* is used to denote the connection site). The structures of 30 donors is shown in Figure S1, and that of 43 acceptors is shown in Figure S2. After the enumeration of fragments, a random pick routine is used to further restrict the size to 1000.

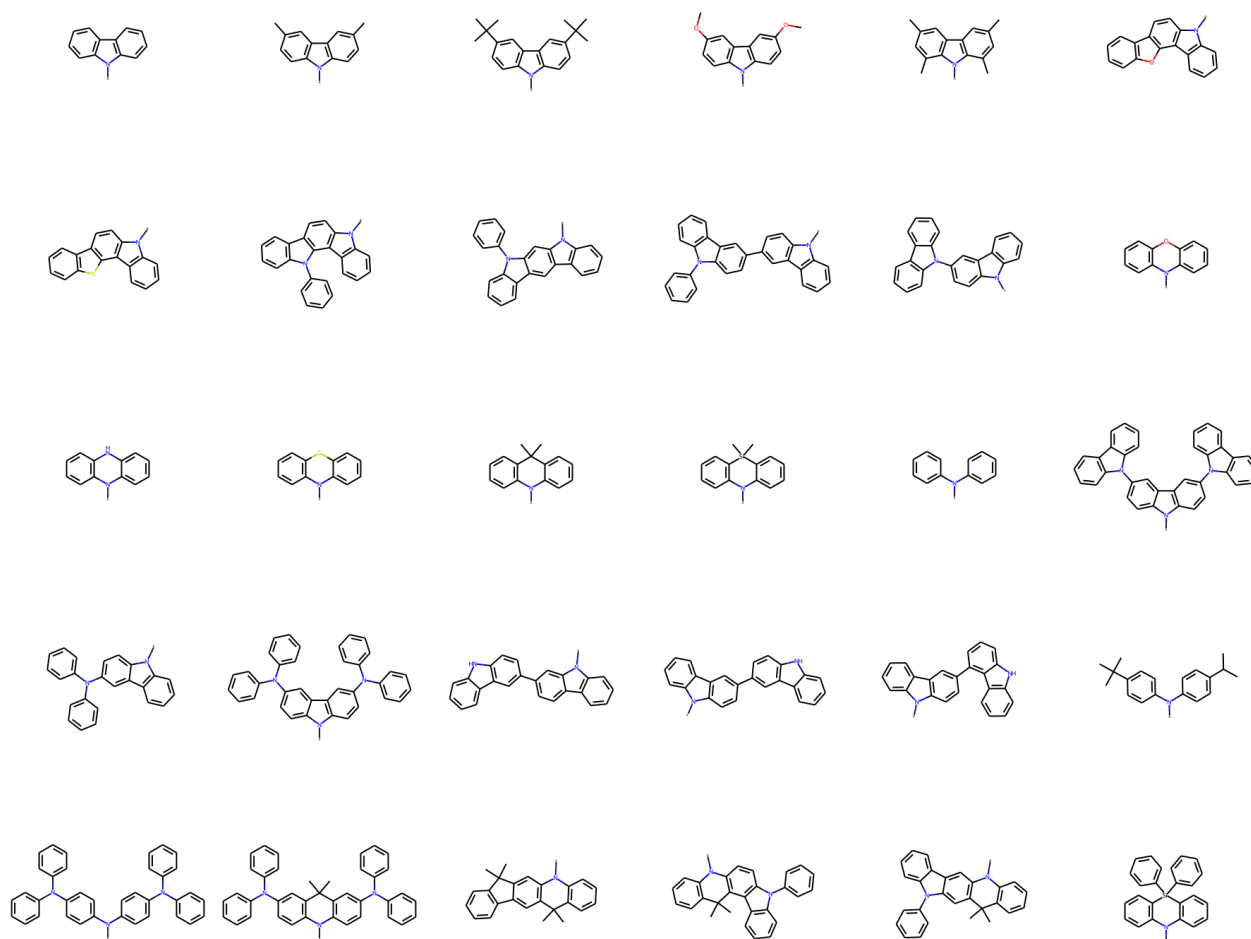

Figure S1: The donors (D) used as fragments for construction of donor-acceptor (DA) molecules (\* is used to denote the connection site)

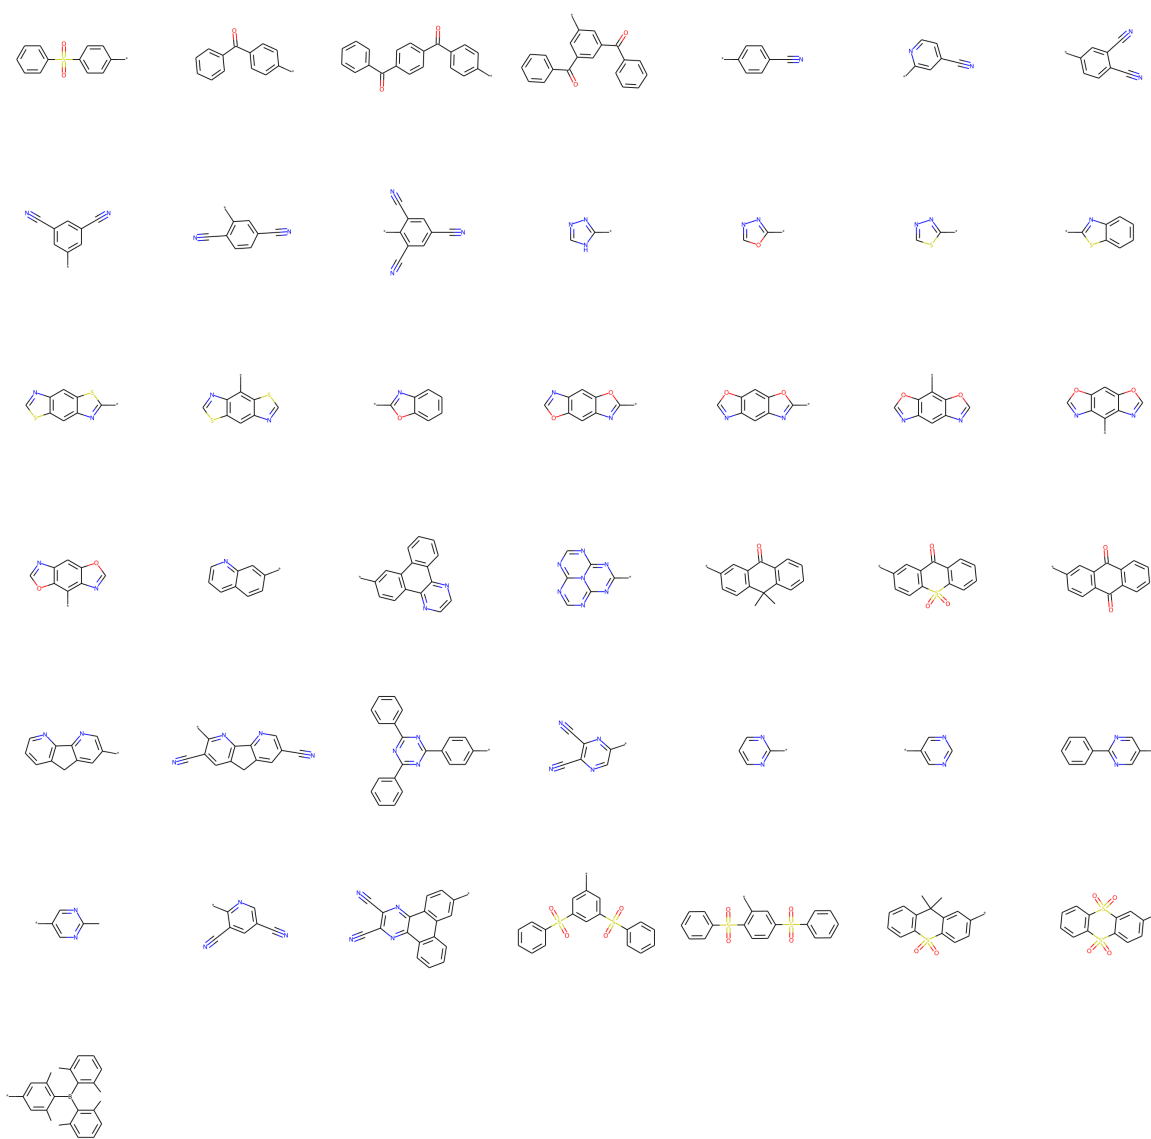

Figure S2: The acceptors (A) used as fragments for construction of donor-acceptor (DA) molecules (\* is used to denote the connection site)

# Effect of varied ground state geometry optimization methods

The difference in ground state geometries calculated by B3LYP/6-31G(d) and PM6-D3 levels of theory is measured by their root-mean-square deviations (RMSDs). The distribution of frequency of RMSDs is given in Figure **S3**. For a total of 72 molecules, only 25% of them have RMSD values larger than 0.69, hence, from a point of view of probability, the replacement of B3LYP/6-31G(d) by PM6-D3 method seems acceptable.

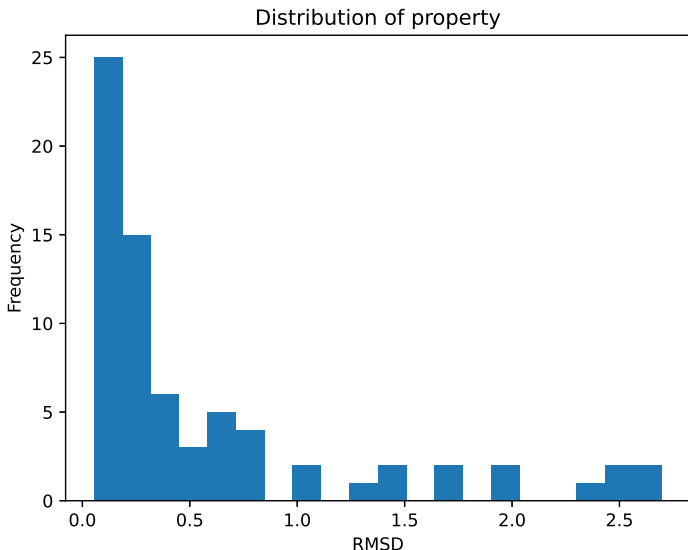

Figure S3: The distribution of frequency of RMSDs for **Sub3**.

The effect of varied ground state geometry optimization methods on the HTVS results have been briefly tested. The evolution of material abundance ( $\omega_{MA}$ ), average number of aromatic aCH bonds ( $n_{aCH}$ ) and number of accumulated optimal molecules ( $n_{acc\_opt\_mols}$ ) with increase of mutation generation ( $n_g$ ) for **Sub3** using B3LYP/6-31G(d) level of theory as ground state geometry optimization method have been listed in Table **S1**. As compared with the semi-empirical method, the investment on a relatively high accuracy computational one seems to have the effect to speed up the convergence of  $\omega_{MA}$ . Hence is beneficial for harvesting more optimal molecules at relatively low  $n_g$ .

**Table S1:** The evolution of material abundance ( $\omega_{MA}$ ), average number of aromatic aCH bonds ( $n_{aCH}$ ) and number of accumulated optimal molecules ( $n_{acc\_opt\_mols}$ ) with increase of mutation generation ( $n_g$ ) for Sub3 using B3LYP/6-31G(d) level of theory as ground state geometry optimization method

| $n_g$ | $\omega_{MA}$ | $n_{aCH}$ | $n_{acc\_opt\_mols}$ |
|-------|---------------|-----------|----------------------|
| 0     | 0.016         | 18.3      | 16                   |
| 1     | 0.212         | 16.9      | 220                  |
| 2     | 0.892         | 12.5      | 988                  |
| 3     | 0.969         | 11.7      | 1808                 |
| 4     | 0.960         | 11.8      | 2637                 |
| 5     | 0.962         | 9.7       | 3482                 |
| 6     | 1.000         | 8.0       | 4306                 |

# The evolution of skeleton (generic core) with mutation generation for Sub3

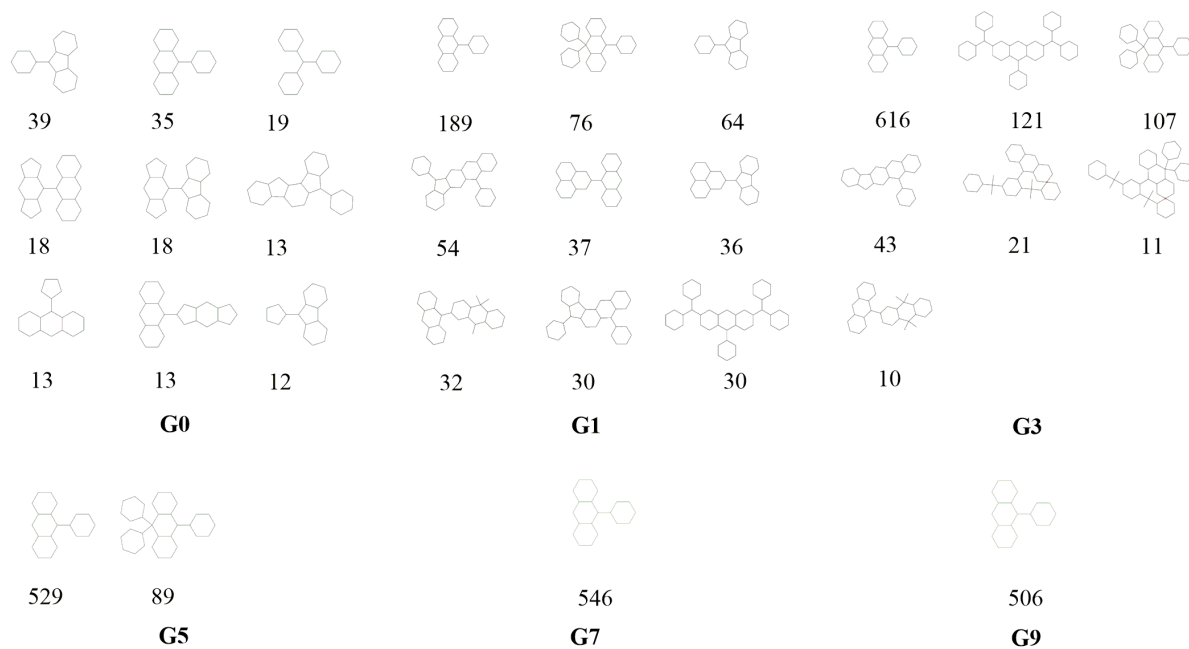

Figure S4: The evolution of skeleton (generic core) with mutation generation for **Sub3** (the numbers below structures denote the corresponding frequencies).

# Details for training and evaluation of machine learning model

**Table S2: The evolution of cross validation scores, mean and standard deviation of best ML models with increase of mutation generation ( $n_g$ ) for Sub3**

| $n_g$ | scores |       |       |       |       | mean  | std   |
|-------|--------|-------|-------|-------|-------|-------|-------|
| 0     | 0.174  | 0.206 | 0.180 | 0.254 | 0.169 | 0.197 | 0.031 |
| 1     | 0.228  | 0.282 | 0.170 | 0.124 | 0.110 | 0.183 | 0.064 |
| 2     | 0.104  | 0.070 | 0.094 | 0.317 | 0.169 | 0.151 | 0.089 |
| 3     | 0.059  | 0.094 | 0.093 | 0.255 | 0.095 | 0.119 | 0.069 |
| 4     | 0.049  | 0.104 | 0.048 | 0.037 | 0.180 | 0.084 | 0.054 |
| 5     | 0.028  | 0.035 | 0.040 | 0.079 | 0.035 | 0.043 | 0.018 |
| 6     | 0.092  | 0.068 | 0.032 | 0.019 | 0.039 | 0.050 | 0.026 |
| 7     | 0.052  | 0.013 | 0.017 | 0.032 | 0.028 | 0.029 | 0.014 |
| 8     | 0.021  | 0.015 | 0.032 | 0.012 | 0.045 | 0.025 | 0.012 |
| 9     | 0.016  | 0.023 | 0.021 | 0.026 | 0.073 | 0.032 | 0.021 |

The featurization of structures of training molecules is carried out by utilizing the ECFP fingerprint (size = 2048) computing tool of the DeepChem package. By introducing the related tools of the open source machine learning Scikit-Learn package, a Random Forest Regressor (RandomForestRegressor, RFR) from the ensemble module is adopted as the ML model, Grid Search Cross Validation (GridSearchCV) and relevant score function and method (cross\_val\_score and neg\_mean\_squared\_error) as tools for model selection, simple imputer (SimpleImputer) as data imputer, and a min max scaler (MinMaxScaler) for data scaling. The following grid parameters have been used for the Grid Search Cross Validation step: ‘bootstrap’: [ True, False ], ‘n\_estimators’: [ 3, 10, 30, 100 ], ‘criterion’: [“mse”, “mae”], ‘max\_depth’: [ 2, 5, 10, 50 ], ‘max\_features’: [“auto”, “sqrt”, “log2”]

The ECFP fingerprints as the X featurization vector, and the computed energy gaps ( $\Delta E_{ST}$ ) as the Y object vector. The X;Y is fed to the RFR model, by applying the GridSearchCV with above grid parameters, the cross\_val\_score method and 5-fold cross validation, the best ML model (best\_reg) is screened out from the grid search hyper-parameter space. The best\_reg is retrained with the training data, and is further evaluated by a 5-fold

cross validation using the same scoring method (neg\_mean\_squared\_error). The newly learned ML model will be used for subsequent predicting property of unseen molecules in the original compound library ( $n_g$  keeps unchanged).

To have a taste on the relative accuracy of the ML models, the related data for **Sub3** has been given in Table S2. Obviously, the mean and standard deviation are small enough, hence the ML model could be safely used to predict the energy gaps of unseen molecules with considerable confidence.



## Optimal molecules sorted by SAS

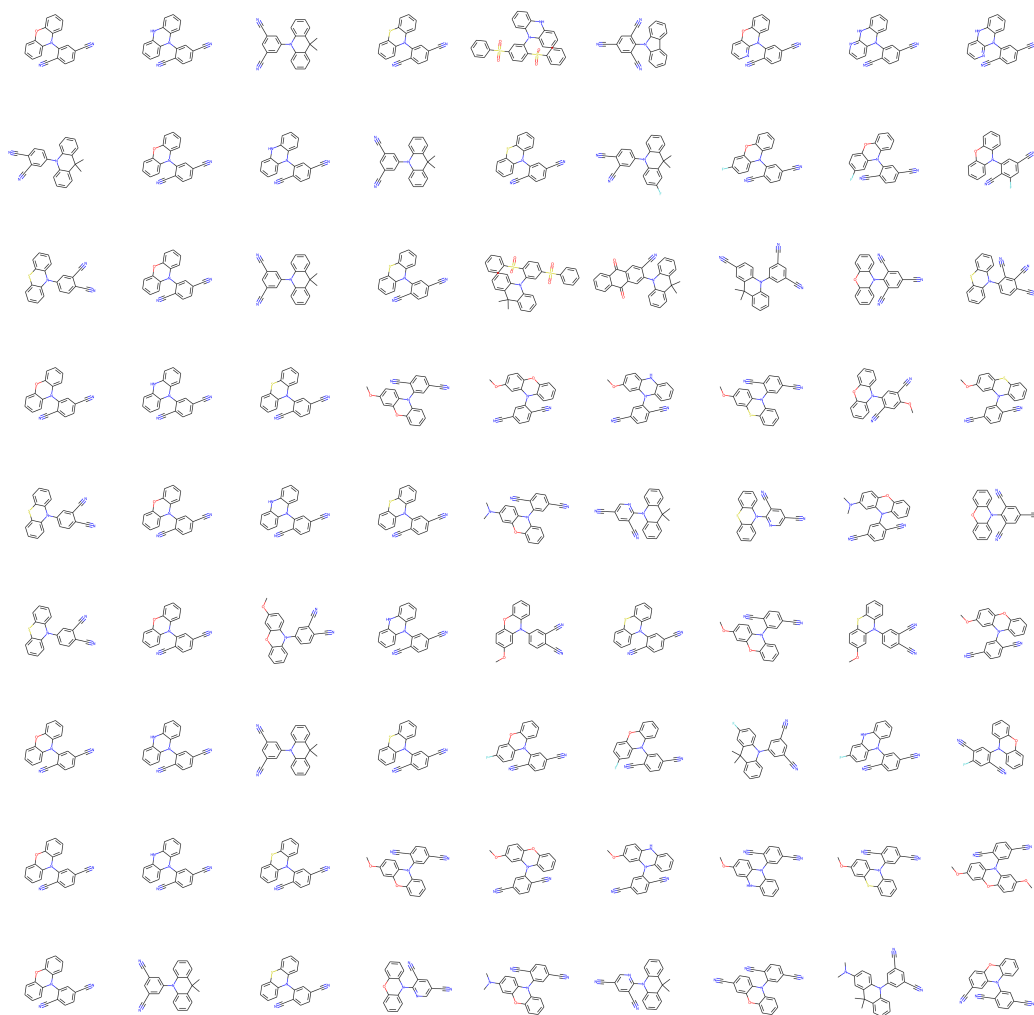

Figure S5: The structures of 9 optimal molecules with lowest SAS for all mutations except **Sub2** (each row corresponds to a mutation, row 1  $\rightarrow$  **Sub1**)

The (energy gap) optimal molecules for all mutations have been sorted by Synthetic Accessibility Scores from low to high, so as to give recommendation for TADF materials candidate. The structures of 9 molecules with lowest SAS for all mutations except **Sub2** have been depicted in Figure **S5**. Notably, duplication between different rows exists due to the origin setup of the computational road map.

## Maximum Similarity Pairing Rule

The calculation of group fingerprint similarity ( $\Delta_{MSPR}$ ) is based on the following algorithm, which we name it the Maximum Similarity Pairing Rule (MSPR). Suppose we have two compound libraries  $L_A$  and  $L_B$ , which are represented by two SMILES-based string lists  $SML_A$  and  $SML_B$ .

- (1.) Assume their sizes are  $m$  and  $n$ , and  $m \leq n$ . If not, we exchange A and B.
- (2.) Check whether there are intersection elements between  $SML_A$  and  $SML_B$  or not? If yes, the two libraries  $SML_A$  and  $SML_B$  can be represent by  $SML_A = SML_{Intersection} + SML_{A1}$  and  $SML_B = SML_{Intersection} + SML_{B1}$ . Set the size of  $SML_{Intersection}$  is  $p$ . Now, a mapping has been established between the intersection parts of the two libraries (one A molecule versus one B molecule).
- (3.) Introducing ECFP fingerprint method to represent molecules and adopting Tanimoto metric, we can construct a  $(m - p) \times (n - p)$  similarity matrix C whose matrix element  $c_{ij}$  is defined as the Tanimoto similarity between  $SML_{A1}(i)$  and  $SML_{B1}(j)$ .
- (4.) Find the larget element of the similarity matrix C, assume it is  $c_{kl}$ , a row exchange (k to 1) followed by column exchange (l to 1) would shift the larget element to the (1,1) position. At the same time, the exchange (k to 1) positions is applied on a  $(m - p)$  index list to trace the change of order of molecules in  $SML_{A1}$ . Similar manipulation applies to index list of  $SML_{B1}$ .
- (5.) Find the larget element of the submatrix for the old C matrix, which is constructed by deleting the (1,1) element containing row and column. Shift that element to (2,2) position, and apply similar manipulation on index lists.
- (6.) Repeat step (5) until the submatrix containing only 1 element.
- (7.) Take out the main diagonal elements of matrix C as diagonal matrix D. The  $\Delta_{MSPR}$  is calculated by Eq 1

$$\Delta_{MSPR} = \frac{p * 1.0 + \sum_i d_{ii}}{m} \quad (1)$$

By applying the algorithm, the two libraries succeed in building a mapping, which maps  $m$  molecules in A library with  $m$  molecules in B library (one versus one). Notably, the algorithm may not be numerical stable when degeneracy exists. Fortunately, for the cases we studied, it seems working well.

# Optimal Generic Cores for Studied Mutations As $n_g =$

9

The optimal skeletons (generic cores) for studied mutations as  $n_g = 9$  have been depicted in Figure S6.

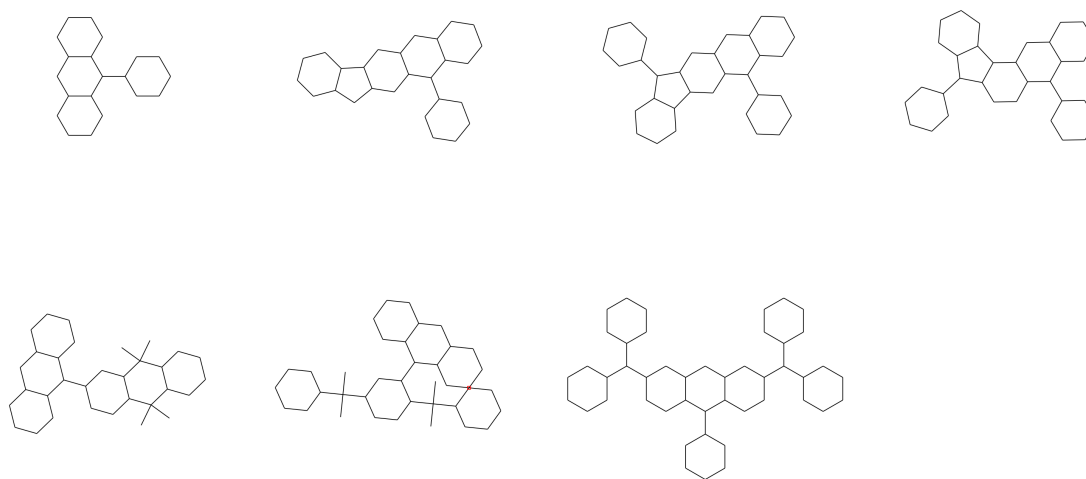

Figure S6: The optimal skeletons (generic cores) for studied mutations as  $n_g = 9$
